# Supplementary material for: Elaborating H-bonding effect and excited state intramolecular proton transfer of 2-(2-hydroxyphenyl)benzothiazole based D–π–A fluorescent dye
Source: Royal Society of Chemistry journal article supplement (doi:10.1039/d4cp04141k), 2025-01-01
Supplement: d4cp04141k1.pdf [file d4cp04141k1.pdf]

# Elaborating H-bonding effect and excited state intramolecular proton transfer of 2-(2-hydroxyphenyl) benzothiazole based D- $\pi$ -A fluorescent dye

Xiu-Min Liu <sup>1a</sup>, Yin Yu <sup>1a</sup>, Shu-Ying Xu<sup>2</sup>, Xue-Hai Ju <sup>1\*</sup>

<sup>1</sup> Key Laboratory of Soft Chemistry and Functional Materials of MOE, School of Chemistry and Chemical Engineering, Nanjing University of Science and Technology, Nanjing 210094, P. R. China

<sup>2</sup> Institute of Research and Development Design, Xinxiang Aviation Industry (Group) CO., LTD, Xinxiang 453000, P. R. China

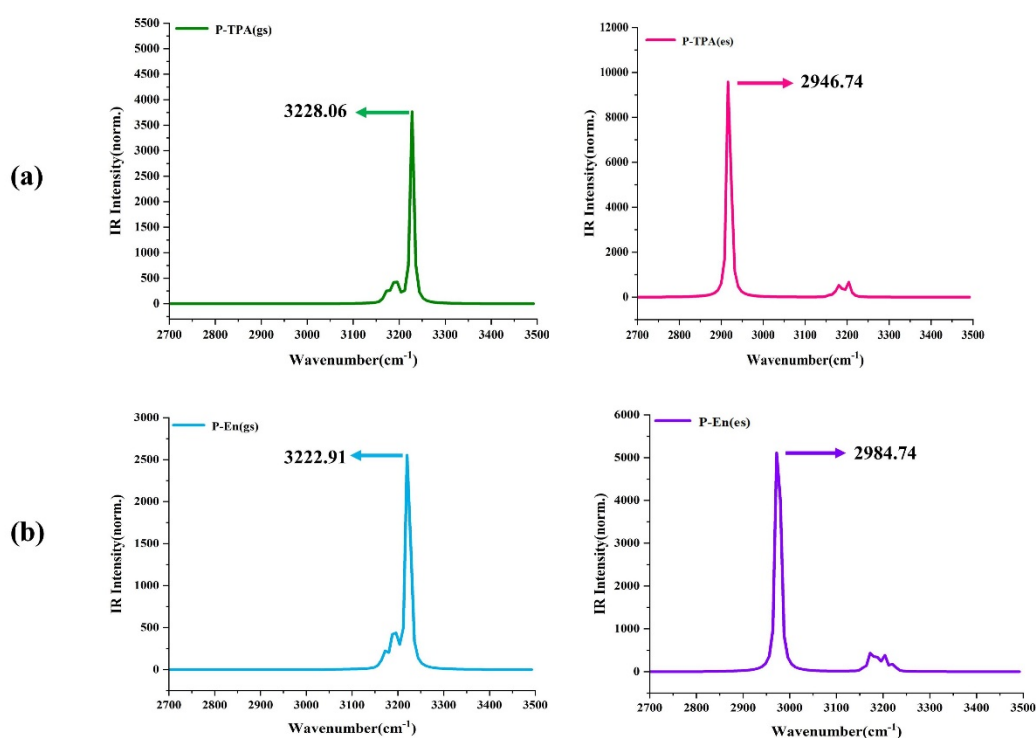

**Fig. S1** Calculated stretching vibrational frequencies of the bond O<sub>1</sub>-H<sub>2</sub> in the S<sub>0</sub> and S<sub>1</sub> state. (a) P-TPA molecules; (b) P-En molecules

\* Corresponding author. [xhju@njust.edu.cn](mailto:xhju@njust.edu.cn) (Xue-Hai Ju)

<sup>a</sup> These authors contributed equally

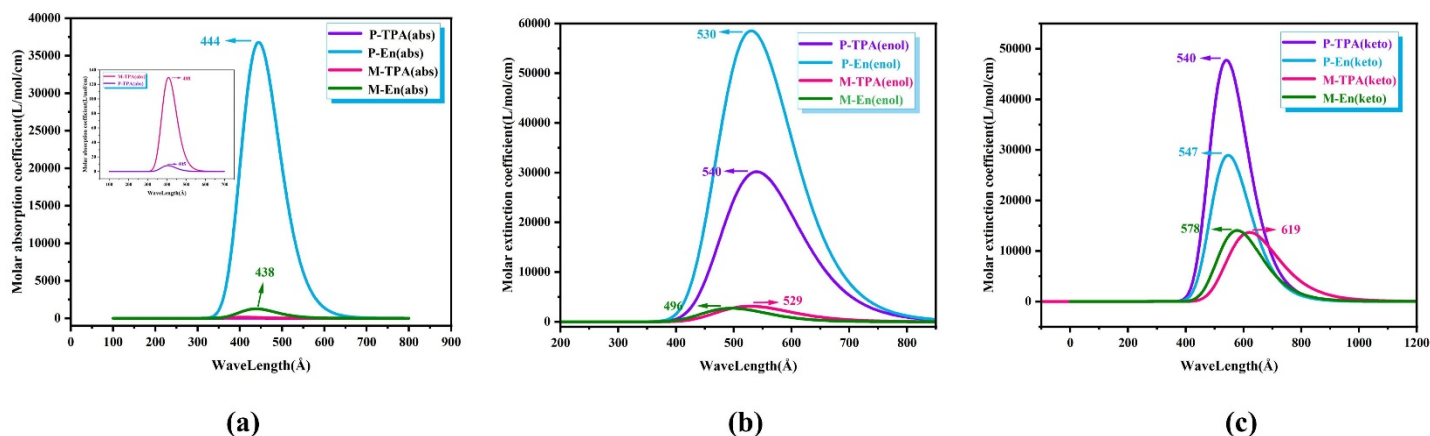

**Fig. S2** Calculated absorption and fluorescence spectra for P-TPA, P-En, M-TPA and M-En molecules. (a) Absorption spectra; (b) Emission spectra of enol forms; (c) Emission spectra of keto forms

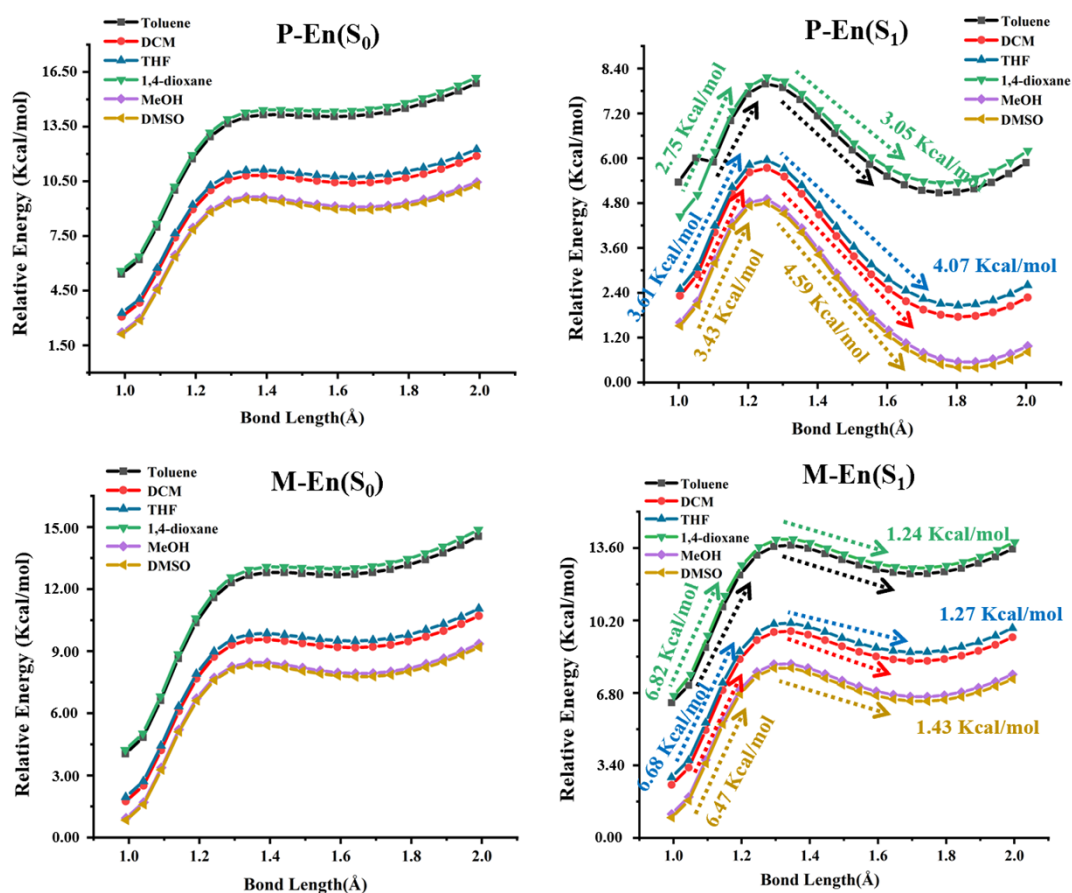

**Fig. S3** Potential energy curves of  $S_0$  and  $S_1$  states of P-En and M-En as a function  $O_1$ -

H<sub>2</sub> bond length in different kinds of solvents (Toluene, DCM, THF, 1,4-dioxane, MeOH, DMSO)

Table S1 lists the hydrogen-bond lengths of four derivatives in the S<sub>0</sub> and S<sub>1</sub> states. Herein, the key atoms involved in forming hydrogen bonds are numbered 1-3. The O<sub>1</sub>–H<sub>2</sub> bond lengths of P-TPA and M-TPA are 0.9919 Å and 0.9921 Å in the S<sub>0</sub> state, increasing to 1.0071 Å and 0.9951 Å in the S<sub>1</sub> state, respectively. The H<sub>2</sub>⋯N<sub>3</sub> distances of P-TPA and M-TPA are 1.7339 Å and 1.7314 Å in the S<sub>0</sub> state, decreasing to 1.6626 Å and 1.7141 Å in the S<sub>1</sub> state, respectively. Moreover, upon photo-excitation process the hydrogen-bond angles δ(O<sub>1</sub>–H<sub>2</sub>–N<sub>3</sub>) of P-TPA and M-TPA increases from 146.99° and 147.26° to 150.99° and 149.55°, respectively. Similar results were found for P-En and M-En, and see supplementary information for detailed analysis.

Similarly, for molecules, the O<sub>1</sub>–H<sub>2</sub> bond lengths increase from 0.9918 Å and 0.9919 Å in the S<sub>0</sub> state to 1.0039 Å and 0.9947 Å in the S<sub>1</sub> state, respectively; the distances of H<sub>2</sub>⋯N<sub>3</sub> shorten from 1.7326 Å and 1.7320 Å in the S<sub>0</sub> state to 1.6741 Å and 1.7164 Å in the S<sub>1</sub> state, respectively. The hydrogen bond angles δ(O<sub>1</sub>–H<sub>2</sub>–N<sub>3</sub>) of P-En and M-En separately increase from 147.04° to 147.13° in the S<sub>0</sub> state to 150.89° and 148.72° in the S<sub>1</sub> state. The alterations in the bond parameters demonstrate that the intramolecular HB strengths of four molecules are strengthened during the photo-excitation process. Moreover, compared with the meta-substitution, the hydrogen bond enhancement effect of para-substitution is more obvious. Thus, the presence of different substitution positions and excited states will affect ESIPT

As shown in Fig. 6, the O<sub>1</sub>–H<sub>2</sub> bond lengths and distances of H<sub>2</sub>⋯N<sub>3</sub> separately increase and shorten during the photo-excitation process, which confirms the ESIHB strengthening mechanism. Additionally, when we investigate the effect of different triphenylamine and anthracenyl groups position on hydrogen bond interaction, notice from Fig. 6 that the O<sub>1</sub>–H<sub>2</sub> bond lengths of P-TPA and P-En are shorter than that of M-TPA and M-En in the S<sub>0</sub> state, respectively; the H<sub>2</sub>⋯N<sub>3</sub> distances of P-TPA and P-En

are longer than that of M-TPA and M-En in  $S_0$  state, respectively. It indicates that the intramolecular hydrogen bonds are stronger in  $S_0$  state as triphenylamine and anthracenyl groups locate at meta-position. On the contrary, the excited-state intramolecular hydrogen bonds of para-substitution are stronger by comparing hydrogen-bond parameters. Upon photoexcitation process, the  $O_1-H_2$  bond lengths of P-TPA and P-En molecules increase by 0.0152 Å and 0.0121 Å, respectively; the  $O_1-H_2$  bond lengths of M-TPA and M-En molecules increase by 0.0030 Å and 0.0028 Å respectively in Fig. 6. Meanwhile, the  $H_2\cdots N_3$  distances of P-TPA and P-En molecules reduce by 0.0713 Å and 0.0585 Å, respectively; the  $H_2\cdots N_3$  distances of M-TPA and M-En molecules reduce by 0.0173 Å and 0.0156 Å respectively in Fig. 6. We find that the changes of intramolecular hydrogen-bond parameters are more drastic as triphenylamine group locates at para-position. Compared with the meta-substitution, the para-substitution of triphenylamine group has the greater impact on intramolecular hydrogen bond.

**Table S1** Bond lengths (Å) and angles ( $^\circ$ ) of  $S_0$  and  $S_1$  states for the studied molecules P-TPA, M-TPA, P-En and M-En in dimethyl sulfoxide solvent

| Species | $O_1-H_2$ |        | $H_2\cdots N_3$ |        | $\delta(O_1-H_2-N_3)$ |        |
|---------|-----------|--------|-----------------|--------|-----------------------|--------|
|         | $S_0$     | $S_1$  | $S_0$           | $S_1$  | $S_0$                 | $S_1$  |
| P-TPA   | 0.9919    | 1.0071 | 1.7339          | 1.6626 | 146.99                | 150.99 |
| M-TPA   | 0.9921    | 0.9951 | 1.7314          | 1.7141 | 147.26                | 149.55 |
| P-En    | 0.9918    | 1.0039 | 1.7326          | 1.6741 | 147.04                | 150.89 |
| M-En    | 0.9919    | 0.9947 | 1.7320          | 1.7164 | 147.13                | 148.72 |

**Table S2** Observed absorption and emission spectra of P-TPA in different solvent, as well as Stocks' shifts and the oscillator strengths of  $N^*$  and  $K^*$

| Solvent               | $\lambda_{abs}$ (nm) | $\lambda_{em}$ (nm) | Stokes' shifts (nm) | Oscillator Strengths |       |
|-----------------------|----------------------|---------------------|---------------------|----------------------|-------|
|                       |                      |                     |                     | $N^*$                | $K^*$ |
| Toluene               | 442                  | 506                 | 64                  | 0.879                | 0.598 |
| Dichloromethane (DCM) | 444                  | 521                 | 77                  | 1.318                | 1.024 |

|                           |     |     |     |       |       |
|---------------------------|-----|-----|-----|-------|-------|
| Tetrahydrofuran (THF)     | 443 | 519 | 76  | 1.285 | 0.987 |
| 1,4-dioxane               | 441 | 505 | 64  | 0.836 | 0.565 |
| Methanol (MeOH)           | 443 | 529 | 86  | 1.433 | 1.162 |
| Dimethyl sulfoxide (DMSO) | 405 | 540 | 135 | 1.445 | 1.179 |

**Table S3** Observed absorption and emission spectra of M-TPA in different solvent, as well as Stocks' shifts and the oscillator strengths of N\* and K\*

| Solvent                   | $\lambda_{\text{abs}}$ (nm) | $\lambda_{\text{em}}$ (nm) | Stokes' shifts (nm) | Oscillator Strengths |       |
|---------------------------|-----------------------------|----------------------------|---------------------|----------------------|-------|
|                           |                             |                            |                     | N*                   | K*    |
| Toluene                   | 439                         | 518                        | 79                  | 0.058                | 0.287 |
| Dichloromethane (DCM)     | 438                         | 525                        | 87                  | 0.072                | 0.326 |
| Tetrahydrofuran (THF)     | 438                         | 525                        | 87                  | 0.071                | 0.323 |
| 1,4-dioxane               | 439                         | 518                        | 79                  | 0.058                | 0.283 |
| Methanol (MeOH)           | 438                         | 528                        | 90                  | 0.077                | 0.336 |
| Dimethyl sulfoxide (DMSO) | 408                         | 529                        | 121                 | 0.077                | 0.337 |

**Table S4** Observed absorption and emission spectra of P-En in different solvent, as well as Stocks' shifts and the oscillator strengths of N\* and K\*

| Solvent                   | $\lambda_{\text{abs}}$ (nm) | $\lambda_{\text{em}}$ (nm) | Stokes' shifts (nm) | Oscillator Strengths |       |
|---------------------------|-----------------------------|----------------------------|---------------------|----------------------|-------|
|                           |                             |                            |                     | N*                   | K*    |
| Toluene                   | 411                         | 513                        | 102                 | 0.547                | 0.224 |
| Dichloromethane (DCM)     | 407                         | 532                        | 125                 | 0.693                | 0.693 |
| Tetrahydrofuran (THF)     | 407                         | 530                        | 123                 | 0.682                | 0.573 |
| 1,4-dioxane               | 412                         | 480                        | 68                  | 0.551                | 0.008 |
| Methanol (MeOH)           | 405                         | 538                        | 133                 | 0.740                | 0.703 |
| Dimethyl sulfoxide (DMSO) | 444                         | 530                        | 86                  | 0.745                | 0.714 |

**Table S5** Observed absorption and emission spectra of M-En in different solvent, as well as Stocks' shifts and the oscillator strengths of N\* and K\*

| Solvent                   | $\lambda_{\text{abs}}$ (nm) | $\lambda_{\text{em}}$ (nm) | Stokes' shifts (nm) | Oscillator Strengths |       |
|---------------------------|-----------------------------|----------------------------|---------------------|----------------------|-------|
|                           |                             |                            |                     | N*                   | K*    |
| Toluene                   | 412                         | 484                        | 72                  | 0.002                | 0.200 |
| Dichloromethane (DCM)     | 409                         | 497                        | 88                  | 0.057                | 0.301 |
| Tetrahydrofuran (THF)     | 409                         | 497                        | 88                  | 0.055                | 0.291 |
| 1,4-dioxane               | 412                         | 499                        | 87                  | 0.037                | 0.037 |
| Methanol (MeOH)           | 408                         | 496                        | 88                  | 0.066                | 0.342 |
| Dimethyl sulfoxide (DMSO) | 438                         | 496                        | 58                  | 0.067                | 0.347 |

**Table S6** Gibbs free energy values (Hartree) of normal, TS and isomer structures of P-TPA molecules in six solvents, as well as the proton-transfer activation energy barriers (Kcal/mol) in the  $S_0$  and  $S_1$  states

| States | Solvent     | Normal (Hartree) | TS (Hartree) | Barrier (Kcal/mol) | Isomer (Hartree) | Reversed barrier (Kcal/mol) |
|--------|-------------|------------------|--------------|--------------------|------------------|-----------------------------|
| GS     | Toluene     | -1777.876653     | -1777.861925 | 9.24               | -1777.862061     | 0.08                        |
|        | DCM         | -1777.881047     | -1777.867923 | 8.23               | -1777.868621     | 0.43                        |
|        | THF         | -1777.880652     | -1777.867385 | 8.33               | -1777.868031     | 0.41                        |
|        | 1,4-dioxane | -1777.876301     | -1777.861434 | 9.32               | -1777.861587     | 0.09                        |
|        | MeOH        | -1777.882596     | -1777.870024 | 7.89               | -1777.870940     | 0.58                        |
|        | DMSO        | -1777.882789     | -1777.870279 | 7.85               | -1777.871228     | 0.60                        |
| ES     | Toluene     | -1777.779663     | -1777.774045 | 3.52               | -1777.778535     | 2.81                        |
|        | DCM         | -1777.784741     | -1777.779654 | 3.19               | -1777.786013     | 3.99                        |
|        | THF         | -1777.784285     | -1777.779151 | 3.22               | -1777.785343     | 3.88                        |
|        | 1,4-dioxane | -1777.779257     | -1777.773596 | 3.55               | -1777.777931     | 2.72                        |
|        | MeOH        | -1777.786525     | -1777.781625 | 3.07               | -1777.788621     | 4.39                        |
|        | DMSO        | -1777.786746     | -1777.781869 | 3.06               | -1777.788942     | 4.43                        |

**Table S7** Gibbs free energy values (Hartree) of normal, TS and isomer structures of M-TPA molecules in six solvents, as well as the proton-transfer activation energy barriers (Kcal/mol) in the  $S_0$  and  $S_1$  states

| States | Solvent | Normal (Hartree) | TS (Hartree) | Barrier (Kcal/mol) | Isomer (Hartree) | Reversed barrier (Kcal/mol) |
|--------|---------|------------------|--------------|--------------------|------------------|-----------------------------|
| GS     | Toluene | -1777.875183     | -1777.860663 | 9.11               | -1777.860895     | 0.15                        |

|    |             |              |              |      |              |      |
|----|-------------|--------------|--------------|------|--------------|------|
| ES | DCM         | -1777.879547 | -1777.866613 | 8.11 | -1777.867370 | 0.47 |
|    | THF         | -1777.879155 | -1777.866078 | 8.21 | -1777.866784 | 0.44 |
|    | 1,4-dioxane | -1777.874833 | -1777.860181 | 9.19 | -1777.860340 | 0.10 |
|    | MeOH        | -1777.881087 | -1777.868685 | 7.78 | -1777.869673 | 0.62 |
|    | DMSO        | -1777.881278 | -1777.868938 | 7.74 | -1777.869943 | 0.63 |
|    | Toluene     | -1777.780400 | -1777.769146 | 7.06 | -1777.770570 | 0.89 |
|    | DCM         | -1777.787256 | -1777.776652 | 6.65 | -1777.778608 | 1.23 |
|    | THF         | -1777.786621 | -1777.775947 | 6.70 | -1777.777847 | 1.19 |
|    | 1,4-dioxane | -1777.779876 | -1777.768576 | 7.09 | -1777.769965 | 0.87 |
|    | MeOH        | -1777.789757 | -1777.779447 | 6.47 | -1777.781643 | 1.37 |
|    | DMSO        | -1777.790068 | -1777.779797 | 6.44 | -1777.782027 | 1.39 |

**Table S8** Gibbs free energy values (Hartree) of normal, TS and isomer structures of P-En molecules in six solvents, as well as the proton-transfer activation energy barriers (Kcal/mol) in the  $S_0$  and  $S_1$  states

| States | Solvent     | Normal<br>(Hartree) | TS<br>(Hartree) | Barrier<br>(Kcal/mol) | Isomer<br>(Hartree) | Reversed barrier<br>(Kcal/mol) |
|--------|-------------|---------------------|-----------------|-----------------------|---------------------|--------------------------------|
| GS     | Toluene     | -1567.643497        | -1567.62890     | 9.15                  | -1567.629079        | 0.11                           |
|        | DCM         | -1567.647407        | -1567.634452    | 8.12                  | -1567.635154        | 0.44                           |
|        | THF         | -1567.647052        | -1567.633949    | 8.22                  | -1567.634597        | 0.40                           |
|        | 1,4-dioxane | -1567.643187        | -1567.628449    | 9.24                  | -1567.628601        | 0.09                           |
|        | MeOH        | -1567.648807        | -1567.636415    | 7.77                  | -1567.637350        | 0.52                           |
|        | DMSO        | -1567.648982        | -1567.636655    | 7.73                  | -1567.637624        | 0.60                           |
| ES     | Toluene     | -1567.541065        | -1567.536683    | 2.75                  | -1567.541541        | 3.04                           |
|        | DCM         | -1567.546133        | -1567.540434    | 3.57                  | -1567.547076        | 4.16                           |
|        | THF         | -1567.545831        | -1567.540084    | 3.60                  | -1567.546568        | 4.06                           |
|        | 1,4-dioxane | -1567.542592        | -1567.536389    | 3.89                  | -1567.541120        | 2.96                           |
|        | MeOH        | -1567.547323        | -1567.541828    | 3.44                  | -1567.549083        | 4.55                           |
|        | DMSO        | -1567.54747         | -1567.542004    | 3.43                  | -1567.549333        | 4.59                           |

**Table S9** Gibbs free energy values (Hartree) of normal, TS and isomer structures of M-En molecules in six solvents, as well as the proton-transfer activation energy barriers (Kcal/mol) in the  $S_0$  and  $S_1$  states

| States | Solvent | Normal<br>(Hartree) | TS<br>(Hartree) | Barrier<br>(Kcal/mol) | Isomer<br>(Hartree) | Reversed barrier<br>(Kcal/mol) |
|--------|---------|---------------------|-----------------|-----------------------|---------------------|--------------------------------|
|--------|---------|---------------------|-----------------|-----------------------|---------------------|--------------------------------|

|    |             |              |              |      |              |      |
|----|-------------|--------------|--------------|------|--------------|------|
| GS | Toluene     | -1567.643257 | -1567.628658 | 9.16 | -1567.628836 | 0.11 |
|    | DCM         | -1567.647090 | -1567.634048 | 8.18 | -1567.634714 | 0.41 |
|    | THF         | -1567.646746 | -1567.633562 | 8.27 | -1567.634182 | 0.38 |
|    | 1,4-dioxane | -1567.642950 | -1567.628211 | 9.24 | -1567.628367 | 0.09 |
|    | MeOH        | -1567.648436 | -1567.635915 | 7.85 | -1567.636791 | 0.54 |
|    | DMSO        | -1567.648602 | -1567.636141 | 7.81 | -1567.637037 | 0.56 |
| ES | Toluene     | -1567.545675 | -1567.534804 | 6.82 | -1567.536785 | 1.24 |
|    | DCM         | -1567.551341 | -1567.540744 | 6.64 | -1567.54280  | 1.29 |
|    | THF         | -1567.550829 | -1567.540178 | 6.68 | -1567.542194 | 1.26 |
|    | 1,4-dioxane | -1567.54520  | -1567.534393 | 6.78 | -1567.536395 | 1.25 |
|    | MeOH        | -1567.553354 | -1567.543003 | 6.49 | -1567.545263 | 1.41 |
|    | DMSO        | -1567.553605 | -1567.543288 | 6.47 | -1567.545577 | 1.43 |

The electron donor substituents can provide electrons to the reaction center through conjugation, which makes it easier for electron transfer reaction to occur, thus speeding up the reaction rate. The electron-withdrawing groups generally reduce the electron cloud density of the entire system. In this section, the substitution effects of benzothiazole on electron donor groups and electron withdrawing groups (para- and meta-triphenylamine and DNP) are systematically investigated to regulate the photophysical properties and hydrogen bonding behavior of molecules in DMSO solvents, as shown in Figure S4. They are denoted by P-TPA, M-TPA, P-DNP, M-DNP (Figure S5). Among them, the nitrogen atom in the center of triphenylamine has a lone electron pair, which can be regarded as the iso-electron body of carbon ion, and DNP group has a strong electron absorption ability.



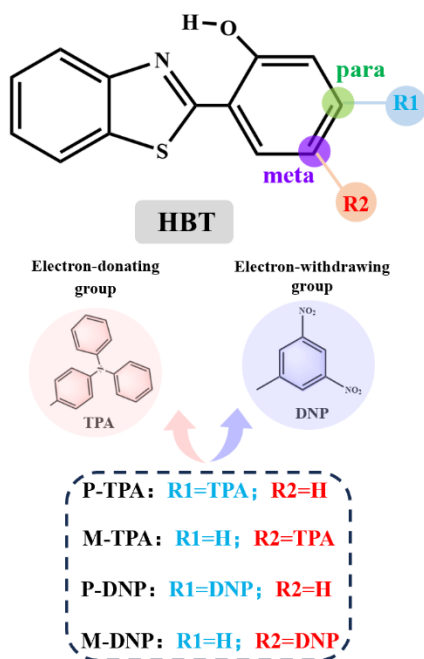

**Fig. S4** Chemical structures of P-TPA, M-TPA, P-DNP and M-DNP

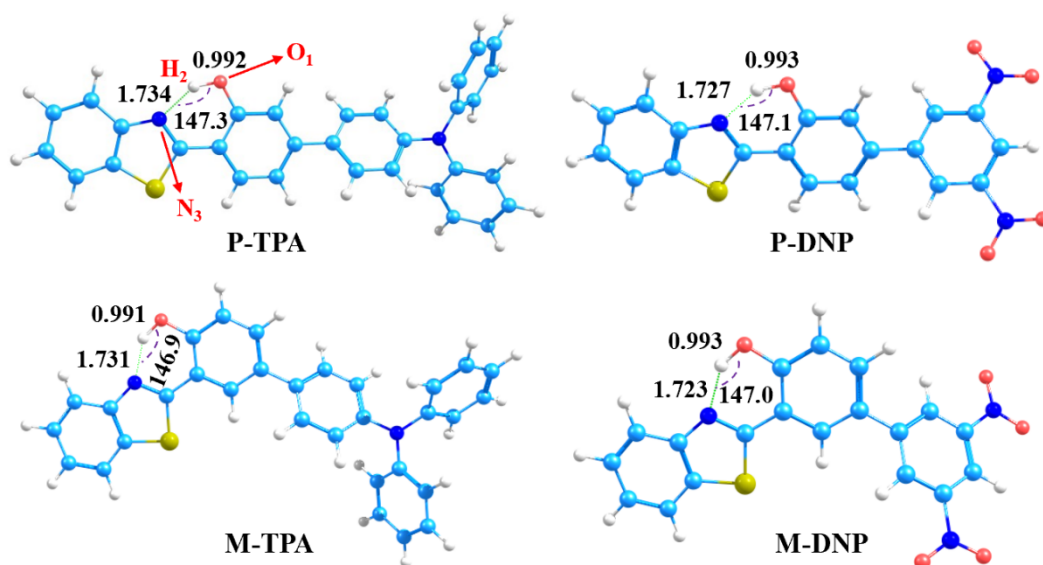

**Fig. S5** Geometric configurations and bond parameters of P-TPA, M-TPA, P-DNP and M-DNP. (cyan: C atom; red: O atom; blue: N atom; and white: H atom)

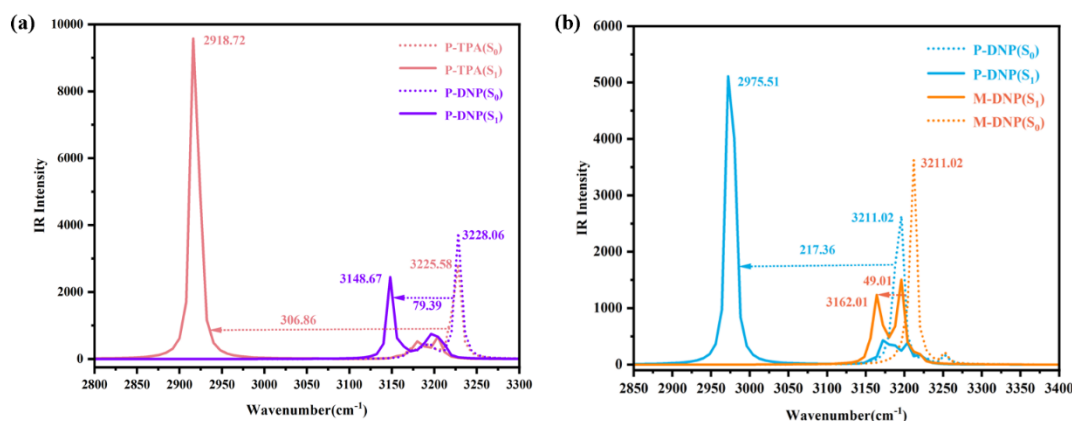

**Fig. S6** Simulated IR spectra of the studied molecules (P-TPA, M-TPA, P-DNP and M-DNP)

Indeed, analyzing the strength of hydrogen bonds by comparing the changes in the vibrational frequency of the hydroxyl group in the IR spectra after light excitation is a widely used method. When the strength of a hydrogen bond changes or when a new hydrogen bond forms, it impacts the vibrational energy of the hydroxyl group. This impact is observable as shifts in the IR absorption peaks. The simulated IR spectra of the molecules are presented in Figure S6. As shown, the hydroxyl vibration peaks of HBT and its derivatives have different degrees of variation. The red-shift values of P-TPA, M-TPA, P-DNP and M-DNP are 306.86, 217.36, 79.39 and 49.01  $\text{cm}^{-1}$ . For these studied molecules, the order of change for  $-\text{OH}$  strength is  $\text{P-TPA} > \text{M-TPA} > \text{P-DNP} > \text{M-DNP}$ . In general, the substitution of electron-withdrawing groups will weaken intramolecular hydrogen bond, and the stronger the electron-withdrawing ability, the more obvious the influence. Substitution with triphenylamine group will obtain better enhancement than substitution of the DNP group.

It is well understood that the absorption and fluorescence properties of compounds are intimately connected to electronic transitions. Consequently, Figure S7 illustrates the highest occupied molecular orbital (HOMO) and the lowest unoccupied molecular orbital (LUMO), allowing for the observation of electron cloud distribution both before and after light excitation. In general, the introduction of the electron donating group can raise the HOMO energy level, which leads to the enhanced electron-giving ability of the compound. And it can also make the energy gap between HOMO and LUMO

decrease, which is favorable to the transition. The substitution of electron- withdrawing groups results in the opposite.

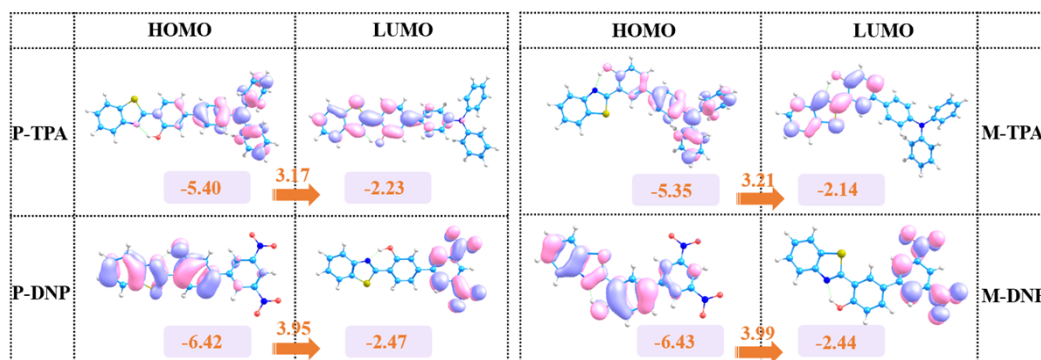

**Fig. S7** The frontier molecular orbitals of P-TPA, M-TPA, P-DNP, M-DNP and the corresponding energy and energy gap values (eV)
